# Supplementary material for: Detection of Microsatellite Instability in Colonoscopic Biopsies and Postal Urine Samples from Lynch Syndrome Cancer Patients Using a Multiplex PCR Assay
Source: Cancers (Basel). 2022 Aug 8;14(15):3838. doi: 10.3390/cancers14153838 (PMC9367254; doi:10.3390/cancers14153838)
Supplement: Supplementary file 1 [file cancers-14-03838-s001.zip]

Archive with 4 entries (4 files):
- cancers-1773862-supplementary figures.pdf
- cancers-1773862-supplementary table S1.xlsx
- cancers-1773862-supplementary table S2.xlsx
- cancers-1773862-supplementary table S3.xlsx
