# Supplementary material for: Detection of Microsatellite Instability in Colonoscopic Biopsies and Postal Urine Samples from Lynch Syndrome Cancer Patients Using a Multiplex PCR Assay
Source: Cancers (Basel). 2022 Aug 8;14(15):3838. doi: 10.3390/cancers14153838 (PMC9367254; doi:10.3390/cancers14153838)
Supplement: Supplementary file 1 [file cancers-14-03838-s001.zip › cancers-1773862-supplementary table S1.xlsx]

## Sheet: mPCR Primers
Target/Description	Forward Primer Name	Forward Primer Sequence (5' to 3')	Reverse Primer Name	Reverse Primer Sequence (5' to 3')	Chromosome	Amplicon Start	Amplicon End	Microsatellite Length	Microsatellite Base	Microsatellite Start	Microsatellite End	SNP	SNP Position
BRAF_c.1799T	BRAF_VS_F2	TCCGACGGTAGTGTNNNNCTGTTCAAACTGATGGGACC	BRAF_VS_R	TCGGGAAGCTGAAGNNNNCTTCATGAAGACCTCACAGTAAA	7	140453087	140453185	NA	NA	NA	NA	NA	NA
GM07_SNP1	GM07F_G2	TCCGACGGTAGTGTNNNNGGGCCCTTTTAGGCATATAG	GM07R_G2	TCGGGAAGCTGAAGNNNNCATATGGGGTTTGGTCACA	7	93085688	93085797	11	A	93085748	93085758	rs2283006	93085722
GM09_SNP1	GM09F_G2	TCCGACGGTAGTGTNNNNCCGTATTCCAGGAGTAAGAGTG	GM09R_G2	TCGGGAAGCTGAAGNNNNGGCATAAGGCACAAAAATCA	20	6836939	6837037	8	A	6836977	6836984	rs6038623	6836952
GM11_SNP1	GM11F_G3	TCCGACGGTAGTGTNNNNCGTATCTAAGTATTCTCCAGCTATTCA	GM11R_G3	TCGGGAAGCTGAAGNNNNTGTCACTTCTGAACCATTCCTT	5	166099849	166099950	9	A	166099891	166099899	rs347435	166099902
GM14_SNP1	GM14F_G3	TCCGACGGTAGTGTNNNNCCCAGGCTAAAAGACCAAGA	GM14R_G3	TCGGGAAGCTGAAGNNNNAAAGGATAAACATTGTGGATTGC	3	177328763	177328860	11	A	177328818	177328828	rs6804861	177328829
GM17_SNP1	GM17F_G2	TCCGACGGTAGTGTNNNNAGAAGTCAGTGCATGTGTCTTTT	GM17R_G2	TCGGGAAGCTGAAGNNNNTTTTAATGCTATAAATATCCAGTGATG	11	95551064	95551162	10	A	95551111	95551119	rs666398	95551136
IM16_SNP1	IM16F_G2	TCCGACGGTAGTGTNNNNAATTGGAATCAGCAGTGTTCA	IM16R_G2	TCGGGAAGCTGAAGNNNNGCAGTAATTTCCATGCTGAGTA	18	1108727	1108812	9	A	1108767	1108775	rs4392141	1108738
LR24_SNP1	LR24F_G2	TCCGACGGTAGTGTNNNNGGTAACCAAAGCAGGAAAACATT	LR24R_G2	TCGGGAAGCTGAAGNNNNCCCACATTTTTGGATATATGTATGGT	1	153779392	153779469	9	A	153779429	153779437	rs1127091	153779412
LR36_SNP1	LR36F_G2	TCCGACGGTAGTGTNNNNGCTGGCACTTGTGGTGAC	LR36R_G2	TCGGGAAGCTGAAGNNNNTTTGCACTCTTTGCACACC	4	98999669	98999773	12	A	98999723	98999734	rs17550217	98999699
LR40_SNP1	LR40F_G2	TCCGACGGTAGTGTNNNNTTTGATTTGACTTCTCTAAAAATGATA	LR40R_G2	TCGGGAAGCTGAAGNNNNTCCAAACATTTCTACTTTAGGAGTTT	2	13447421	13447514	9	A	13447470	13447478	rs6432372	13447484
LR44_SNP1	LR44_EF_G3R	TCCGACGGTAGTGTNNNNAGGCTCATTTGAGGCCAAG	LR44_ER_G3R	TCGGGAAGCTGAAGNNNNAAAAACAGTCAAGGAACAAAAGTG	10	99898222	99898330	12	A	99898286	99898297	rs7905384	99898268
LR49_SNP1	LR49F_G2	TCCGACGGTAGTGTNNNNCTTGCGACATGAGCAAATAA	LR49R_G2	TCGGGAAGCTGAAGNNNNTCCAAATTCAGCCTCAGACA	15	93619005	93619096	7	A	93619048	93619054	rs12903384	93619037
LR52_SNP1	LR52F_G3	TCCGACGGTAGTGTNNNNAATGTGTTTTGAGAAAAGGTTACA	LR52R_G3	TCGGGAAGCTGAAGNNNNAAACGAGATAAAATTCCTTTTCC	16	63861397	63861477	12	A	63861441	63861452	rs2434849	63861437

## Sheet: MIP Redesigns
Table S1. mPCR Primers, Sequencing Primers and MIP probes. Amplicon and microsatellite positions are included relative to the Hg19 human reference sequence.
Target/Description	MIP Name	MIP Sequence (5' to 3')	Chromosome	Amplicon Start	Amplicon End	Microsatellite Length	Microsatellite Base	Microsatellite Start	Microsatellite End	SNP	SNP Position
GM07_SNP1	GM07_104640	CTCTATATGCCTAAAAGGGCCCNNNNCTTCAGCTTCCCGATATCCGACGGTAGTGTNNNNTTGGTCACATTTTTACCTCTTTC	7	93085688	93085787	11	A	93085748	93085758	rs2283006	93085722
GM09_SNP1	GM09_69684	GCATAAGGCTAGGATCATTTCATTCAAGANNNNCTTCAGCTTCCCGATATCCGACGGTAGTGTNNNNCATTGGAATCACCCTG	20	6836909	6837008	8	A	6836977	6836984	rs6038623	6836952
GM11_SNP1	GM11_95738	GCTGGAGAATACTTAGATACGTAGGTGNNNNCTTCAGCTTCCCGATATCCGACGGTAGTGTNNNNCTGAACCATTCCTTAATT	5	166099843	166099942	9	A	166099891	166099899	rs347435	166099902
GM14_SNP1	GM14_76533	GCTAGCAATCCACAATGTTTATCCTTTGCNNNNCTTCAGCTTCCCGATATCCGACGGTAGTGTNNNNCCCAGGCTAAAAGACC	3	177328763	177328862	11	A	177328818	177328828	rs6804861	177328829
GM17_SNP1	GM17_22690	AAGACACATGCACTGACTTCTGCAAGGGNNNNCTTCAGCTTCCCGATATCCGACGGTAGTGTNNNNTGCTATAAATATCCAGT	11	95551057	95551156	10	A	95551111	95551119	rs666398	95551136
IM16_SNP1	IM16_50762	TCCAATTATTTTTCCTTGACTATTGAATNNNNCTTCAGCTTCCCGATATCCGACGGTAGTGTNNNNTTTCCATGCTGAGTAAT	18	1108706	1108805	9	A	1108767	1108775	rs4392141	1108738
LR24_SNP1	LR24_5767	GTGGGAAAAATACTTATTCCAGGGAGNNNNCTTCAGCTTCCCGATATCCGACGGTAGTGTNNNNAGGTAACCAAAGCAGG	1	153779391	153779490	9	A	153779429	153779437	rs1127091	153779412
LR36_SNP1	LR36_87641	AGCAGGTGTGCAAAGAGTGCAAAGATAANNNNCTTCAGCTTCCCGATATCCGACGGTAGTGTNNNNGTGGTGACCCTGAACGT	4	98999679	98999778	12	A	98999723	98999734	rs17550217	98999699
LR40_SNP1	LR40_60907	ATGTTTGGATTCTTATGGTATGTGGCTTNNNNCTTCAGCTTCCCGATATCCGACGGTAGTGTNNNNCTCTAAAAATGATAGTA	2	13447434	13447533	9	A	13447470	13447478	rs6432372	13447484
LR44_SNP1	LR44_13912	GGTCTTGAACTCTTGGCCTCAAATGAGCNNNNCTTCAGCTTCCCGATATCCGACGGTAGTGTNNNNGTCAAGGAACAAAAGTG	10	99898224	99898323	12	A	99898286	99898297	rs7905384	99898268
LR49_SNP1	LR49_31922	GTCGCAAGACTGGGGTCTCCTCCTNNNNCTTCAGCTTCCCGATATCCGACGGTAGTGTNNNNCAGCCTCAGACATTTCTCCTC	15	93618989	93619088	7	A	93619048	93619054	rs12903384	93619037
LR52_SNP1	LR52_41754	GCTTCTTGTAACCTTTTCTCAAAACACATNNNNCTTCAGCTTCCCGATATCCGACGGTAGTGTNNNNAGGCAATCTTTAAAAC	16	63861398	63861497	12	A	63861441	63861452	rs2434849	63861437

## Sheet: Universal Amplification Primers
Target/Description	Primer Name	Primer Sequence (5' to 3')
Universal amplification (forward primer)	Univ_Ampli_F	AATGATACGGCGACCACCGAGATCTACACATACGAGATCCGTAATCGGGAAGCTGAAG
Universal amplification (reverse primer)	Univ_Ampli_R_SIxxx*	CAAGCAGAAGACGGCATACGAGAT-[8bp sample index]-ACACGCACGATCCGACGGTAGTGT
*xxx is a unique numeric identifier depending on the 8bp sample index included in the primer (see Hiatt et al. 2013, PMID: 23382536, DOI: 10.1101/gr.147686.112)

## Sheet: Sequencing Primers
Target/Description	Primer Name	Sequence
Sequencing primer (read 1)	Read1_Seq_Primer	CATACGAGATCCGTAATCGGGAAGCTGAAG
Sequencing primer (index read)	Index_Seq_Primer	ACACTACCGTCGGATCGTGCGTGT
Sequencing primer (read 2)	Read2_Seq_Primer	ACACGCACGATCCGACGGTAGTGT
