# Supplementary material for: Detection of Microsatellite Instability in Colonoscopic Biopsies and Postal Urine Samples from Lynch Syndrome Cancer Patients Using a Multiplex PCR Assay
Source: Cancers (Basel). 2022 Aug 8;14(15):3838. doi: 10.3390/cancers14153838 (PMC9367254; doi:10.3390/cancers14153838)
Supplement: Supplementary file 1 [file cancers-14-03838-s001.zip › cancers-1773862-supplementary table S2.xlsx]

## Sheet: CRC biopsy and related
Table S2. CRC Biopsy barcode counts and classification. Sample details, MSI scores and classifications, and read and MB counts (total and adjusted) are shown for CRC biopsy and related samples.
Sample	SampleType	SampleID	SampleGroup	Tumour % Estimate	fastq	MSIscore	MSI classification	QC	Adjusted.Median.MBs (/3.2)	Total.Reads	Median.Reads	Total.MBs	Median.MBs
D326846origMNRnBRAF	Resected tumour	D326846origMNRnBRAF	LS CRC 1	N/A	D326846origMNRnBRAF_S1	17.8	MSI-H	PASS	413	28832	2393	15760	1321
D301081origMNRnBRAF	Resected tumour	D301081origMNRnBRAF	LS CRC 2	N/A	D301081origMNRnBRAF_S2	17.7	MSI-H	PASS	249	45212	3510	9960	796
D316605origMNRnBRAF	Resected tumour	D316605origMNRnBRAF	LS CRC 3	N/A	D316605origMNRnBRAF_S3	19.9	MSI-H	PASS	300	43019	3478	12387	961
D312217origMNRnBRAF	Resected tumour	D312217origMNRnBRAF	LS CRC 4	N/A	D312217origMNRnBRAF_S4	10.8	MSI-H	PASS	343	70211	5578	13297	1099
A11361461	Single endoscopic biopsy	21 1555 A1 - 1	LS CRC 1	0.7	A11361461_S17	12.4	MSI-H	PASS	1686	86366	6899	67660	5396
A1143614681	Composite endoscopic biopsies	21 1555 A1 - All	LS CRC 1	N/A	A1143614681_S4	12.4	MSI-H	PASS	1422	81243	6222	59577	4551
A1143614682	Composite endoscopic biopsies	21 1555 A1 - All	LS CRC 1	N/A	A1143614682_S8	14.7	MSI-H	PASS	1664	99198	8002	67086	5326
A12361463	Single endoscopic biopsy	21 1555 A1 - 2	LS CRC 1	Necrotic	A12361463_S18	12	MSI-H	PASS	709	38655	3105	28323	2268
A13361465	Single endoscopic biopsy	21 1555 A1 - 3	LS CRC 1	0	A13361465_S19	-15.3	MSS	PASS	1309	60937	4927	51388	4188
A14361467	Single endoscopic biopsy	21 1555 A1 - 4	LS CRC 1	Necrotic	A14361467_S20	-4.4	MSS	PASS	1185	53599	4677	44123	3794
A21361432	Single endoscopic biopsy	19 14367 A2 - 1	LS CRC 2	0.8	A21361432_S11	16.7	MSI-H	PASS	1558	77039	6202	61649	4985
A2163614401	Composite endoscopic biopsies	19 14367 A2 - All	LS CRC 2	N/A	A2163614401_S5	14.7	MSI-H	PASS	1391	70261	5568	56254	4451
A2163614402	Composite endoscopic biopsies	19 14367 A2 - All	LS CRC 2	N/A	A2163614402_S9	11.3	MSI-H	PASS	1383	73258	5751	55544	4425
A22361433	Single endoscopic biopsy	19 14367 A2 - 2	LS CRC 2	0.7	A22361433_S12	14.7	MSI-H	PASS	1506	82269	6290	62903	4819
A23361434	Single endoscopic biopsy	19 14367 A2 - 3	LS CRC 2	0	A23361434_S13	-6.3	MSS	PASS	1092	51902	4077	44155	3496
A25461437	Single endoscopic biopsy	19 14367 A2 - 5	LS CRC 2	0.5	A25461437_S14	14.7	MSI-H	PASS	325	15791	1270	13095	1039
A26361438	Single endoscopic biopsy	19 14367 A2 - 6	LS CRC 2	0.3	A26361438_S15	17	MSI-H	PASS	1355	70897	5569	55610	4336
D21361451	Single endoscopic biopsy	20 8258 D2 - 1	LS CRC 3	0.5	D21361451_S21	12.5	MSI-H	PASS	1088	56808	4571	43833	3480
D2153614591	Composite endoscopic biopsies	20 8258 D2 - All	LS CRC 3	N/A	D2153614591_S6	20.4	MSI-H	PASS	747	32526	2725	28633	2389
D2153614592	Composite endoscopic biopsies	20 8258 D2 - All	LS CRC 3	N/A	D2153614592_S10	18.1	MSI-H	PASS	1589	74849	6270	59952	5084
D22361452	Single endoscopic biopsy	20 8258 D2 - 2	LS CRC 3	0.4	D22361452_S22	15.6	MSI-H	PASS	1636	81551	6570	65376	5236
D23361453	Single endoscopic biopsy	20 8258 D2 - 3	LS CRC 3	0.2	D23361453_S23	15.6	MSI-H	PASS	665	32705	2661	26826	2129
D24361457	Single endoscopic biopsy	20 8258 D2 - 4	LS CRC 3	0.2	D24361457_S24	22.2	MSI-H	PASS	1267	67544	5108	53020	4053
D25361458	Single endoscopic biopsy	20 8258 D2 - 5	LS CRC 3	Only Dysplasia	D25361458_S25	19.9	MSI-H	PASS	1643	82473	7000	62201	5259
F21361443	Single endoscopic biopsy	20 4811 F2 - 1	LS CRC 4	0.8	F21361443_S26	10.8	MSI-H	PASS	1429	76917	5632	61066	4574
F214361450	Composite endoscopic biopsies	20 4811 F2 - All	LS CRC 4	N/A	F214361450_S7	15.6	MSI-H	PASS	1322	65065	5050	53447	4229
F22361445	Single endoscopic biopsy	20 4811 F2 - 2	LS CRC 4	0.9	F22361445_S27	12.5	MSI-H	PASS	1242	64665	4797	52433	3973
F23361447	Single endoscopic biopsy	20 4811 F2 - 3	LS CRC 4	0.3	F23361447_S28	10.7	MSI-H	PASS	1226	61076	4799	49943	3925
F24361448	Single endoscopic biopsy	20 4811 F2 - 4	LS CRC 4	0	F24361448_S29	-16	MSS	PASS	1506	78977	5930	63225	4821
155089mPCR	MSS resected tumour control	155089mPCR	Sporadic CRCs	N/A	155089mPCR_S100	-8.26472	MSS	PASS	705.156	38523	2962	28592	2256.5
155090mPCR	MSS resected tumour control	155090mPCR	Sporadic CRCs	N/A	155090mPCR_S75	-12.1744	MSS	PASS	573.906	31962	2349	24444	1836.5
167234mPCR	MSS resected tumour control	167234mPCR	Sporadic CRCs	N/A	167234mPCR_S95	-13.9654	MSS	PASS	721.875	34013	2924.5	27734	2310
168888mPCR	MSS resected tumour control	168888mPCR	Sporadic CRCs	N/A	168888mPCR_S98	-10.6315	MSS	PASS	454.375	21254	1605	18994	1454
204448mPCR	MSI-H resected tumour control	204448mPCR	Sporadic CRCs	N/A	204448mPCR_S88	13.6124	MSI-H	PASS	200.625	16051	1365	8052	642
210177mPCR	MSS resected tumour control	210177mPCR	Sporadic CRCs	N/A	210177mPCR_S70	-12.9064	MSS	PASS	1300	67041	5763	50588	4160
210179mPCR	MSS resected tumour control	210179mPCR	Sporadic CRCs	N/A	210179mPCR_S69	-10.7922	MSS	PASS	1964.22	93967	7861	72952	6285.5
210386mPCR	MSS resected tumour control	210386mPCR	Sporadic CRCs	N/A	210386mPCR_S80	-9.61765	MSS	PASS	928.125	50027	3859	37225	2970
210777mPCR	MSS resected tumour control	210777mPCR	Sporadic CRCs	N/A	210777mPCR_S92	-12.9064	MSS	PASS	710.156	34192	2739.5	28370	2272.5
210778mPCR	MSS resected tumour control	210778mPCR	Sporadic CRCs	N/A	210778mPCR_S73	-13.8266	MSS	PASS	1028.75	53306	4132.5	41751	3292
212963mPCR	MSS resected tumour control	212963mPCR	Sporadic CRCs	N/A	212963mPCR_S97	-2.76763	MSS	PASS	690.938	29489	2452.5	26305	2211
215118mPCR	MSS resected tumour control	215118mPCR	Sporadic CRCs	N/A	215118mPCR_S79	-12.8568	MSS	PASS	986.875	59042	4645	40164	3158
215770mPCR	MSS resected tumour control	215770mPCR	Sporadic CRCs	N/A	215770mPCR_S78	-10.7414	MSS	PASS	1733.59	89708	7498.5	65496	5547.5
216379mPCR	MSS resected tumour control	216379mPCR	Sporadic CRCs	N/A	216379mPCR_S71	-9.07009	MSS	PASS	1554.84	87579	6358.5	66641	4975.5
220045mPCR	MSS resected tumour control	220045mPCR	Sporadic CRCs	N/A	220045mPCR_S76	-11.9458	MSS	PASS	1232.03	60872	4844.5	49220	3942.5
220926mPCR	MSS resected tumour control	220926mPCR	Sporadic CRCs	N/A	220926mPCR_S77	-9.66567	MSS	PASS	607.344	61960	4500.5	27130	1943.5
223129mPCR	MSS resected tumour control	223129mPCR	Sporadic CRCs	N/A	223129mPCR_S90	-9.72845	MSS	PASS	514.531	23892	1855.5	20947	1646.5
223962mPCR	MSS resected tumour control	223962mPCR	Sporadic CRCs	N/A	223962mPCR_S95	-3.18444	MSS	PASS	5220.47	614746	43240	211903	16705.5
225162mPCR	MSS resected tumour control	225162mPCR	Sporadic CRCs	N/A	225162mPCR_S96	-4.5542	MSS	FAIL	62.6562	5854	457.5	2873	200.5
225729mPCR	MSS resected tumour control	225729mPCR	Sporadic CRCs	N/A	225729mPCR_S94	-11.0073	MSS	PASS	877.344	40588	3197.5	35300	2807.5
226724mPCR	MSS resected tumour control	226724mPCR	Sporadic CRCs	N/A	226724mPCR_S91	-9.68401	MSS	PASS	204.844	10758	840	8252	655.5
227175mPCR	MSS resected tumour control	227175mPCR	Sporadic CRCs	N/A	227175mPCR_S93	-13.0435	MSS	PASS	1006.25	45254	3750	38513	3220
229995mPCR	MSS resected tumour control	229995mPCR	Sporadic CRCs	N/A	229995mPCR_S99	-13.3229	MSS	PASS	2002.81	120364	8704.5	84699	6409
234543mPCR	MSI-H resected tumour control	234543mPCR	Sporadic CRCs	N/A	234543mPCR_S102	25.5999	MSI-H	PASS	794.688	36476	2941.5	31476	2543
237780mPCR	MSI-H resected tumour control	237780mPCR	Sporadic CRCs	N/A	237780mPCR_S84	14.7089	MSI-H	PASS	1338.44	66155	5394	52480	4283
238659mPCR	MSI-H resected tumour control	238659mPCR	Sporadic CRCs	N/A	238659mPCR_S82	19.2597	MSI-H	PASS	1213.44	65685	5307.5	48609	3883
239222mPCR	MSI-H resected tumour control	239222mPCR	Sporadic CRCs	N/A	239222mPCR_S103	22.7799	MSI-H	PASS	387.5	20759	1593	16621	1240
239970mPCR	MSI-H resected tumour control	239970mPCR	Sporadic CRCs	N/A	239970mPCR_S83	16.8637	MSI-H	PASS	1088.44	69421	5222	46836	3483
241981mPCR	MSI-H resected tumour control	241981mPCR	Sporadic CRCs	N/A	241981mPCR_S106	21.7728	MSI-H	PASS	387.5	19273	1503.5	16117	1240
244881mPCR	MSI-H resected tumour control	244881mPCR	Sporadic CRCs	N/A	244881mPCR_S87	24.3199	MSI-H	PASS	598.75	39216	2820.5	27019	1916
245457mPCR	MSI-H resected tumour control	245457mPCR	Sporadic CRCs	N/A	245457mPCR_S92	15.1092	MSI-H	FAIL	25.3125	2778	195.5	1051	81
246847mPCR	MSI-H resected tumour control	246847mPCR	Sporadic CRCs	N/A	246847mPCR_S109	28.3841	MSI-H	PASS	783.594	39532	3432.5	29777	2507.5
249555mPCR	MSI-H resected tumour control	249555mPCR	Sporadic CRCs	N/A	249555mPCR_S93	25.7682	MSI-H	PASS	974.844	44853	3988	34347	3119.5
249985mPCR	MSI-H resected tumour control	249985mPCR	Sporadic CRCs	N/A	249985mPCR_S94	25.7362	MSI-H	PASS	853.594	52428	3837.5	36876	2731.5
250505mPCR	MSI-H resected tumour control	250505mPCR	Sporadic CRCs	N/A	250505mPCR_S89	15.89	MSI-H	PASS	941.719	49526	4097	36488	3013.5
250512mPCR	MSI-H resected tumour control	250512mPCR	Sporadic CRCs	N/A	250512mPCR_S107	26.0272	MSI-H	PASS	382.969	20095	1529	16556	1225.5
251058mPCR	MSI-H resected tumour control	251058mPCR	Sporadic CRCs	N/A	251058mPCR_S110	27.9161	MSI-H	PASS	306.406	17358	1460.5	12689	980.5
252048mPCR	MSI-H resected tumour control	252048mPCR	Sporadic CRCs	N/A	252048mPCR_S101	18.2316	MSI-H	PASS	292.969	17400	1221	13521	937.5
254340mPCR	MSS resected tumour control	254340mPCR	Sporadic CRCs	N/A	254340mPCR_S85	-10.2534	MSS	PASS	720	41970	3357.5	27602	2304
254574mPCR	MSS resected tumour control	254574mPCR	Sporadic CRCs	N/A	254574mPCR_S96	-14.2927	MSS	PASS	1070.47	54546	4293.5	44422	3425.5
255075mPCR	MSS resected tumour control	255075mPCR	Sporadic CRCs	N/A	255075mPCR_S74	-13.1011	MSS	PASS	1326.56	59664	4774.5	52242	4245
255078mPCR	MSI-H resected tumour control	255078mPCR	Sporadic CRCs	N/A	255078mPCR_S91	27.4675	MSI-H	PASS	1580	87714	6911	63816	5056
255809mPCR	MSI-H resected tumour control	255809mPCR	Sporadic CRCs	N/A	255809mPCR_S104	23.7186	MSI-H	PASS	1151.88	52048	4522.5	42186	3686
255810mPCR	MSI-H resected tumour control	255810mPCR	Sporadic CRCs	N/A	255810mPCR_S105	25.5178	MSI-H	PASS	1715.94	72929	6626.5	60521	5491
255811mPCR	MSI-H resected tumour control	255811mPCR	Sporadic CRCs	N/A	255811mPCR_S90	22.6501	MSI-H	PASS	1148.28	55611	4270.5	47253	3674.5
256265mPCR	MSS resected tumour control	256265mPCR	Sporadic CRCs	N/A	256265mPCR_S72	-13.4836	MSS	PASS	1907.5	87073	6926.5	73661	6104
256271mPCR	MSI-H resected tumour control	256271mPCR	Sporadic CRCs	N/A	256271mPCR_S112	18.0611	MSI	PASS	1152.19	50491	4301	43667	3687
257349mPCR	MSI-H resected tumour control	257349mPCR	Sporadic CRCs	N/A	257349mPCR_S108	28.8602	MSI-H	PASS	1255.31	62707	5120.5	49615	4017
D227036mPCR	MSI-H resected tumour control	D227036mPCR	Sporadic CRCs	N/A	D227036mPCR_S81	21.87	MSI-H	PASS	1281.72	72252	5323	54796	4101.5
D229113mPCR	MSI-H resected tumour control	D229113mPCR	Sporadic CRCs	N/A	D229113mPCR_S86	16.7446	MSI-H	PASS	1503.28	81806	6297.5	59683	4810.5
D238861mPCR	MSI-H resected tumour control	D238861mPCR	Sporadic CRCs	N/A	D238861mPCR_S111	20.7811	MSI-H	PASS	744.688	45165	2823.5	37012	2383
