# Supplementary material for: Detection of Microsatellite Instability in Colonoscopic Biopsies and Postal Urine Samples from Lynch Syndrome Cancer Patients Using a Multiplex PCR Assay
Source: Cancers (Basel). 2022 Aug 8;14(15):3838. doi: 10.3390/cancers14153838 (PMC9367254; doi:10.3390/cancers14153838)
Supplement: Supplementary file 1 [file cancers-14-03838-s001.zip › cancers-1773862-supplementary table S3.xlsx]

## Sheet: UTUC Samples and MSI Scores
	Table S3. Barcode counts and classification of UTUC and EC samples. Sample details, MSI scores and classifications, and read and MB counts (total and adjusted) are shown for all UTUC and EC related samples.
SampleGroup2	SampleGroupDetail	SampleType	SampleTypeDetail	SampleName	MSIscore	Classification	TotalReads	MedianReads	TotalMBs	MedianMBs	Adjusted3.2xMedianMBs
LS UC patients	LS BUC	FFPE Tumour	Bladder urothelial carcinoma	1143mPCRorig12plexBRAF	14.5425	MSI-H	3610	315	3188	273.5	85
LS UC patients	LS BUC	FFPE Tumour	Bladder urothelial carcinoma	1155mPCRorig12plexBRAF	21.4293	MSI-H	56598	4654.5	21420	1726	539
LS UC patients	LS BUC	FFPE Tumour	Bladder urothelial carcinoma	1181mPCRorig12plexBRAF	14.8076	MSI-H	61846	5039	40529	3234	1011
LS UC patients	LS BUC	FFPE Tumour	Bladder urothelial carcinoma	1265mPCRorig12plexBRAF	21.8765	MSI-H	65080	4611	25468	1825.5	570
LS UC patients	LS UTUC	FFPE Tumour	Upper tract urothelial carcinoma	1334mPCRorig12plexBRAF	16.0959	MSI-H	53093	3686	18982	1238.5	387
LS UC patients	LS UTUC	FFPE Tumour	Upper tract urothelial carcinoma	1353mPCRorig12plexBRAF	19.2328	MSI-H	20541	1676.5	7597	619	193
LS UC patients	LS UTUC	FFPE Tumour	Upper tract urothelial carcinoma	1381mPCRorig12plexBRAF	-7.19024	MSS	53854	4556	26967	2205.5	689
LS UC patients	LS UTUC	FFPE Tumour	Upper tract urothelial carcinoma	1461mPCRorig12plexBRAF	-0.137649	MSS	42893	3634.5	22180	1856.5	580
LS UC patients	LS UTUC	FFPE Tumour	Upper tract urothelial carcinoma	1501mPCRorig12plexBRAF	20.6615	MSI-H	19955	1675	15548	1309.5	409
LS UC patients	LS UTUC	FFPE Tumour	Upper tract urothelial carcinoma	1528mPCRorig12plexBRAF	3.9073	MSI-H	79305	6560	51007	4229.5	1322
LS UTUC case	LS UTUC Patient	Post-op urine (1 month)	Post-op urine	ABD0805002	-7.16698	MSS	60038	5029	30931	2505.5	783
LS UTUC case	LS UTUC Patient	Tumour gDNA	Upper tract urothelial carcinoma	ABD080500TumourDNA	7.09265	MSI-H	105355	8770.5	77498	6646.5	2077
LS UTUC case	LS UTUC Patient	Pre-op plasma (day of op.)	Pre-op plasma	ABPreOpPlasma3	-9.13757	MSS	21404	1715	6319	541	169
LS UTUC case	LS UTUC Patient	Pre-op urine (evening before op.)	Pre-op urine	ABPreOpUrine1	15.0195	MSI-H	35236	3096.5	23603	2052	641
LS UTUC case	LS UTUC Patient	Pre-op urine (morning of op.)	Pre-op urine	ABPreOpUrine2	17.6742	MSI-H	20984	1824.5	13469	1102	344
LS UTUC case	LS UTUC Patient	PBL gDNA	Blood	D080500	-16.5676	MSS	95023	7755.5	68413	5559.5	1737
LS UTUC case	LS UTUC Patient	Post-op plasma (2 months)	Post-op plasma	D080500ABP1310120	-13.2266	MSS	65023	5523	38212	3405.5	1064
LS UTUC case	LS UTUC Patient	Post-op urine (2 months)	Post-op urine	D080500ABU1310120	-5.96872	MSS	31497	2549.5	16671	1302	407
Sporadic UC patients	Sporadic UC Patient LG Papillary	Pre-op urine	Pre-op urine	USS2020003U	-16.1238	MSS	26395	2253	14356	1203	376
Sporadic UC patients	Sporadic UC Patient LG Papillary	Pre-op urine	Pre-op urine	USS2020015U	-7.18757	MSS	11769	975.5	5252	448	140
Sporadic UC patients	Sporadic UC Patient Nephroureterectomy	Pre-op urine	Pre-op urine	USS2020029UmPCRorig12plexBRAF	-17.6195	MSS	85481	7232.5	53453	4568	1428
Sporadic UC patients	Sporadic UC Patient Nephroureterectomy	Pre-op urine	Pre-op urine	USS2020040UorigMNRnBRAF	-18.9707	MSS	141527	12055.5	23751	1846.5	577
Sporadic UC patients	Sporadic UC Patient Nephroureterectomy	Pre-op urine	Pre-op urine	USS2020054UrptmPCRorig12plexBRAF	-1.96421	MSS	25162	2167	8309	758.5	237
Sporadic UC patients	Sporadic UC Patient TCC of kidney	Pre-op urine	Pre-op urine	USS2020055UrptmPCRorig12plexBRAF	-7.12905	MSS	24890	2382	10817	987	308
Sporadic UC patients	Sporadic UC Patient TURBT	Pre-op urine	Pre-op urine	USS2020007UrptmPCRorig12plexBRAF	-8.20157	MSS	9012	780.5	3849	330.5	103
Sporadic UC patients	Sporadic UC Patient TURBT	Pre-op urine	Pre-op urine	USS2020010U	-13.5633	MSS	81584	6616	54067	4467	1396
Sporadic UC patients	Sporadic UC Patient TURBT	Pre-op urine	Pre-op urine	USS2020012U	-15.1271	MSS	15711	1285	10573	863.5	270
Sporadic UC patients	Sporadic UC Patient TURBT	Pre-op urine	Pre-op urine	USS2020013U	-12.6869	MSS	13241	962	5372	391	122
Sporadic UC patients	Sporadic UC Patient TURBT	Pre-op urine	Pre-op urine	USS2020014U	-18.0256	MSS	86476	6665.5	62594	4869	1522
Sporadic UC patients	Sporadic UC Patient TURBT	Pre-op urine	Pre-op urine	USS2020016U	-9.64807	MSS	19580	1543	10819	894	279
Sporadic UC patients	Sporadic UC Patient TURBT	Pre-op urine	Pre-op urine	USS2020019U	-13.8253	MSS	119686	9707.5	62093	5109	1597
Sporadic UC patients	Sporadic UC Patient TURBT	Pre-op urine	Pre-op urine	USS2020021U	-13.2812	MSS	16615	1319.5	8676	702	219
Sporadic UC patients	Sporadic UC Patient TURBT	Pre-op urine	Pre-op urine	USS2020022UmPCRorig12plexBRAF	-10.6685	MSS	70354	6071.5	51847	4469	1397
Sporadic UC patients	Sporadic UC Patient TURBT	Pre-op urine	Pre-op urine	USS2020023UmPCRorig12plexBRAF	19.3036	MSI-H	49517	4194.5	25445	2176	680
Sporadic UC patients	Sporadic UC Patient TURBT	Pre-op urine	Pre-op urine	USS2020024UmPCRorig12plexBRAF	-10.435	MSS	20521	1672.5	8627	685	214
Sporadic UC patients	Sporadic UC Patient TURBT	Pre-op urine	Pre-op urine	USS2020025UmPCRorig12plexBRAF	-8.50671	MSS	60344	5324.5	34169	2912	910
Sporadic UC patients	Sporadic UC Patient TURBT	Pre-op urine	Pre-op urine	USS2020028UmPCRorig12plexBRAF	-13.0261	MSS	25427	1783	22932	1651	516
Sporadic UC patients	Sporadic UC Patient TURBT	Pre-op urine	Pre-op urine	USS2020030UorigMNRnBRAF	-5.93099	PASS	66546	4763.5	22331	1733.5	542
Sporadic UC patients	Sporadic UC Patient TURBT	Pre-op urine	Pre-op urine	USS2020031UmPCRorig12plexBRAF	-14.2786	PASS	74651	6021.5	45039	3683.5	1151
Sporadic UC patients	Sporadic UC Patient TURBT	Pre-op urine	Pre-op urine	USS2020033UmPCRorig12plexBRAF	-5.1649	PASS	48753	4121	23607	1901.5	594
Sporadic UC patients	Sporadic UC Patient TURBT	Pre-op urine	Pre-op urine	USS2020034UorigMNRnBRAF	-15.8484	PASS	155024	11110	88489	6523	2038
Sporadic UC patients	Sporadic UC Patient TURBT	Pre-op urine	Pre-op urine	USS2020037UorigMNRnBRAF	-12.3381	PASS	128788	10529	11151	866	271
Sporadic UC patients	Sporadic UC Patient TURBT	Pre-op urine	Pre-op urine	USS2020038UorigMNRnBRAF	-17.0548	PASS	170882	14063	27111	2233	698
Sporadic UC patients	Sporadic UC Patient TURBT	Pre-op urine	Pre-op urine	USS2020039UorigMNRnBRAF	-12.8541	PASS	53209	4509	14509	1073.5	335
Sporadic UC patients	Sporadic UC Patient TURBT	Pre-op urine	Pre-op urine	USS2020042UorigMNRnBRAF	-17.1091	PASS	134656	11323.5	103845	9059.5	2831
Sporadic UC patients	Sporadic UC Patient TURBT	Pre-op urine	Pre-op urine	USS2020043UorigMNRnBRAF	-11.1474	PASS	21505	1722	10433	864	270
Sporadic UC patients	Sporadic UC Patient TURBT	Pre-op urine	Pre-op urine	USS2020044U2origMNRnBRAF	-4.89111	PASS	10607	804.5	6654	540.5	169
Sporadic UC patients	Sporadic UC Patient TURBT	Pre-op urine	Pre-op urine	USS2020045UorigMNRnBRAF	-15.9192	PASS	62493	3941	24598	1708	534
Sporadic UC patients	Sporadic UC Patient TURBT	Pre-op urine	Pre-op urine	USS2020046UorigMNRnBRAF	-14.8932	PASS	97460	8732	25027	2120.5	663
Sporadic UC patients	Sporadic UC Patient TURBT	Pre-op urine	Pre-op urine	USS2020049UorigMNRnBRAF	-14.7353	PASS	69789	5851.5	17816	1463.5	457
Sporadic UC patients	Sporadic UC Patient TURBT	Pre-op urine	Pre-op urine	USS2020050UrptmPCRorig12plexBRAF	-0.414007	PASS	25869	2136	10897	870	272

## Sheet: EC Samples and MSI Scores
SampleGroup	SampleType	SampleName	MSIscore	Classification	TotalReads	MedianReads	TotalMBs	MedianMBs	Adhusted3.2xMedianMBs
EC Patient Sample	Tumour (biopsy)	389992AWrptTRmPCR	21.0459	MSI-H	25220	1984.5	21757	1712.5	535.156
EC Patient Sample	Tumour (resection)	389992resectionAWrptTRmPCR	14.8913	MSI-H	27086	2145.5	23479	1875.5	586.094
EC Patient Sample	Pre-op urine (>1month)	CPUcfDNA1AWrptTRmPCR	18.0161	MSI-H	10983	994.5	9295	851	265.938
EC Patient Sample	Endometrium	EndometriumAWTRmPCR	-14.2193	MSS	9339	823	8368	732.5	228.906
EC Patient Sample	Fallopian Tube	FallopianTubeAWTRmPCR	-17.2491	MSS	27500	2225.5	23135	1930.5	603.281
EC Patient Sample	Right Ovary	OvaryAWTRmPCR	-9.34932	MSS	11214	1003	9768	888.5	277.656
EC Patient Sample	Post-op urine (2 weeks)	PostOp1CPUcfDNA1AWrptTRmPCR	-12.352	MSS	16328	1463.5	14000	1270	396.875
EC Patient Sample	Post-op urine (3 weeks)	PostOp2CPUcfDNA2AWrptTRmPCR	-15.3818	MSS	25116	2205.5	21560	1930	603.125
EC Patient Sample	Pre-op urine (9 days)	Preop2CPUcfDNA1AWrptTRmPCR	-11.7101	MSS	15082	1327.5	12551	1087	339.688
EC Patient Sample	Uterine Wall	UterineWallAWTRmPCR	-14.2193	MSS	26111	2257	20972	1806	564.375
EC Patient Sample	Pre-op vaginal swab (>1month)	VSgDNA1AWrptTRmPCR	7.38173	MSI-H	11371	969.5	9889	837	261.562
